1

2

3 **Frog nest foam as a drug delivery system**

4 Sarah Brozio<sup>1</sup>, Erin M. O'Shaughnessy<sup>2</sup>, Stuart Woods<sup>1</sup>, Ivan Hall-Barrientos<sup>1</sup>, Patricia E.  
5 Martin<sup>2</sup>, Malcolm W. Kennedy<sup>3</sup>, Dimitrios A. Lamprou<sup>4\*</sup> and Paul A. Hoskisson<sup>1\*</sup>

6

7 <sup>1</sup> Strathclyde Institute of Pharmacy and Biomedical Sciences, University of Strathclyde, 161  
8 Cathedral Street, Glasgow, G4 0RE, UK.

9 <sup>2</sup> Department of Biological and Biomedical Sciences, School of Health and Life Sciences,  
10 Glasgow Caledonian University, G4 OBA, UK.

11 <sup>3</sup> Institute of Biodiversity Animal Health & Comparative Medicine, Graham Kerr Building,  
12 University of Glasgow, Glasgow G12 8QQ, UK.

13 <sup>4</sup> School of Pharmacy, Queen's University Belfast, 97 Lisburn Road, Belfast BT9 7BL, UK

14

15 **\*Correspondence:** [d.lamprou@qub.ac.uk](mailto:d.lamprou@qub.ac.uk); [Paul.hoskisson@strath.ac.uk](mailto:Paul.hoskisson@strath.ac.uk), Tel.: +44 (0)141 548  
16 2819.

17

18

19

20 **Abstract**

21 Foams have frequently been used as systems for the delivery of cosmetic and therapeutic  
22 molecules; however, there is high variability in the foamability and long-term stability of  
23 synthetic foams. The development of pharmaceutical foams that exhibit desirable foaming  
24 properties, delivering appropriate amounts of the active pharmaceutical ingredient (API) and  
25 that have excellent biocompatibility is of great interest. The production of stable foams is rare  
26 in the natural world; however, certain species of frogs have adopted foam production as a means  
27 of providing a protective environment for their eggs and larvae from a predators and parasites,  
28 to prevent desiccation, to control gaseous exchange, temperature extremes, and to reduce UV  
29 damage. These foams show great stability (up to 10 days in tropical environments) and are  
30 highly biocompatible due to the sensitive nature of amphibian skin. This work demonstrates for  
31 the first time, that nests of the Túngara frog (*Engystomops pustulosus*) is stable *ex situ* with  
32 useful physiochemical and biocompatible properties and is capable of encapsulating a range of  
33 compounds, including antibiotics. These protein foam mixtures may find utility as a topical  
34 drug delivery system (DDS).

35

36 **Keywords:** foam; frog; drug delivery; drug release; antibiotics

37

## 38 **Introduction**

39 Foams have been used as delivery systems or vehicles to deliver cosmetic and therapeutic  
40 molecules to normal and injured skin since the 1970's[1–5]. Yet the long-term stability of liquid  
41 aqueous foams has been a challenge, with some formulations offering useful foamability  
42 properties (e.g. foam expansion time), but poor stability[6]. There has been some progress made  
43 through the combination of various foam and surfactant components to create high foamability  
44 and long-term foam stability[6–9]. However, the development of biocompatible, liquid foams  
45 with high foamability and long-term stability remains a challenge in materials science[6]. A  
46 range of foams is already in use for topical treatments, such as Ibuprofen foams (Biatain® Ib)  
47 used to relieve a wide range of exuding wounds, urea-containing foams (KerraFoam) to help  
48 alleviate the symptoms of psoriasis, and antibiotic foams containing clindamycin and other  
49 antimicrobials such as silver sulfacetamide[2,4]. A major advantage of medicated foams is their  
50 ability to cover large surface areas, while containing highly concentrated drugs for topical  
51 treatment[1]. One major difficulty can be the delivery of an adequate concentration of active  
52 pharmaceutical ingredients (APIs) for treatment over a sustained period, therefore often  
53 necessitating repeated, regular applications. In the case of open wounds and burns, regular  
54 removal of dressings may lead to increased infection risk and damage to healing surfaces, aid  
55 the emergence of antimicrobial resistance through the delivery of sub-minimum inhibitory  
56 concentrations of antibiotics, ultimately resulting in reduced infection control and wound  
57 healing[10]. Liposomes have proposed for dermatological applications; however, are exhibit  
58 major stability issues. There is therefore a need for the development of biomaterials that allow  
59 extended times between application combined with high stability and improved  
60 biocompatibility; natural foams can provide these benefits.

61 Anurans (frogs) exhibit enormous diversity in reproductive strategies and styles[11], and many  
62 species of tropical and subtropical frog lay their eggs in stable proteinaceous foams that differ  
63 in composition between species. Foam-nesting behaviour, thought to have evolved as a means  
64 to avoid aquatic predators, prevent desiccation of eggs, control gaseous exchange, buffer  
65 temperature extremes, reduce solar radiation damage, and protect eggs from microbial  
66 colonisation[12]. Stable biological foams and foam-producing surfactants are rare in nature,  
67 presumably due to the requirement for high-energy input for their generation, and the potential  
68 of surface-active components to negatively affect cell and membrane function[13,14]. Frog nest  
69 foams are remarkable for their strong surfactant activity combined with harmlessness to naked  
70 eggs and sperm. The leptodactylid frogs of the neotropics are one such anuran lineage that has

71 evolved stable foams as an offspring protection mechanism. The nests of the Túngara frog  
72 (*Engystomops pustulosus*) are remarkable in structures that act as incubation chambers for  
73 eggs[15] (**Supp. Fig. 1A & B**; <https://doi.org/10.6084/m9.figshare.13281416.v1>), allowing  
74 rapid growth and development of embryos, offering a protective environment against predation,  
75 whilst providing temperature regulation and oxygen transfer for optimal growth conditions.  
76 These nests, there are not destroyed by microbes during larval development despite construction  
77 within highly-microbe-rich water[16]. The foam nest structure is highly stable, remaining  
78 assembled for as much as 10 days in the tropical environment[17,18], yet the surfactant activity  
79 of the foam does not cause damage to the sperm, eggs or developing embryos[13]. The main  
80 surfactant protein within these nests is an 11kDa protein, Ranaspumin-2 (RSN-2), which does  
81 not disrupt biological membranes or cells, but it still provides sufficient surfactant activity at  
82 the air-water interface to allow foam formation[19]. The RSN-2 protein appears to form a  
83 clamshell-like structure, which can undergo an unfolding conformational change to expose  
84 nonpolar patches on the protein surface to the air, while highly polar regions remain in contact  
85 with the water interface to provide the surfactant activity. RSN-2 has been successfully used in  
86 industry as a surfactant in nanoparticle production[20], but the use of the whole nest foam  
87 protein composition in drug delivery or for tissue engineering applications has not been  
88 explored.

89 Here we show that the unseparated, total protein mixture of *E. pustulosus* nest foam is stable *ex*  
90 *situ* for extended periods with useful physiochemical and biocompatible properties and does  
91 not the need of the addition of oxygen as with other drug delivery systems ([21]; DDS) and may  
92 be used to encapsulate a range of hydrophobic and hydrophilic model compounds. These data  
93 suggest that anuran-derived protein foams may have potential applications as DDSs.

94

## 95 **Results & Discussion**

### 96 ***Biophysical properties of Tungara frog foam preparation***

97 The composition and properties of DDSs can determine the effectiveness of drug release, and  
98 while several factors may affect drug release, the thermodynamics driving the passive diffusion  
99 process is key[22]. Thus, increasing and stabilising the local concentration of the permeant is  
100 the simplest strategy to facilitate bioavailability[3]. The protein composition of *E. pustulosus*  
101 foam fluid was analysed by SDS-PAGE (**Supp. Fig. 1C**;  
102 <https://doi.org/10.6084/m9.figshare.13281416.v1>), confirming previous work that foam from  
103 this species contains six major proteins ranging between 10 and 40kDa in size[18] and that the  
104 foam nests used in this study were of typical composition. CD spectra of the samples showed a  
105 negative maximum at 215 nm and a positive maximum at 194 nm, (**Fig. 1A**) indicating that,  
106 cumulatively, the protein mixture in the foam fluid comprises predominately  $\beta$ -sheet structures.  
107 Further insight into secondary structure of the foam mixture was obtained by FTIR, which also  
108 exhibited spectra consistent with overall dominance of  $\beta$ -sheet structures (**Fig 1B**;[\[23\]](#)). For  
109 both foam solutions, transitions were observed at  $\sim 1680\text{ cm}^{-1}$ , which are frequencies  
110 characteristic of Amide I band, signifying C=O bond stretches typically engaged in  $\beta$ -sheet  
111 bonded network structures. These data support previous observations that average secondary  
112 structure content of the proteins is predominantly  $\beta$ -sheet[18] and indicates that the  
113 centrifugation steps in the preparation of the foam for these experiments does not alter the  
114 overall structure and composition of the foam from the wild *E. pustulosus* nests.

Fig. 1

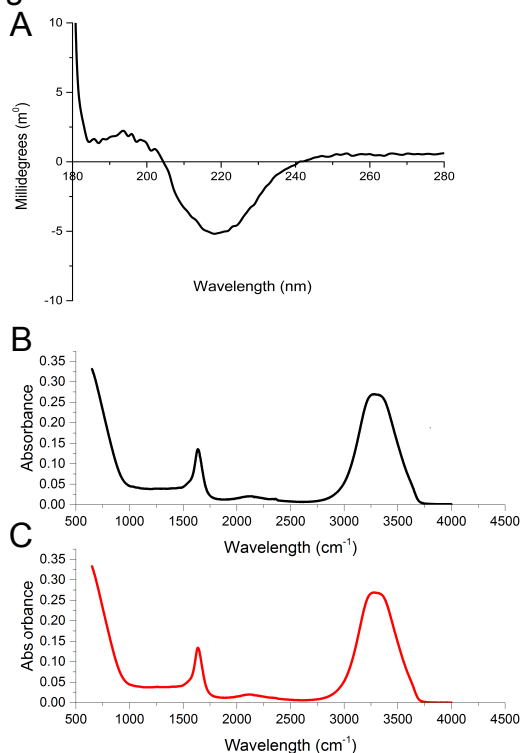

115

116 **Figure. 1. Structural characterisation of *E. pustulosus* nest foam proteins. 1A:** Circular  
117 Dichroism of foam fluid using 0.1mm pathlength cuvettes containing 1mg/ml protein foam  
118 fluid solution. **1B:** Fourier Transform Infrared Spectroscopy (FTIR) foam fluid (**B**) and whole  
119 foam (**C**). For both CD and FTIR spectra were corrected for baseline and buffer effects each  
120 measurement was carried out in triplicate and the mean of the data is presented.

121

122 To investigate the viscoelastic properties of the foam, oscillation sweep experiments were  
123 employed by rheology. The whole foam fluid was found to tolerate up to 100 Pa of shear stress  
124 force before it reaches a breaking point, at which the elastic modulus of the foam decreases and  
125 foam structure and stability is lost (**Fig. 2A**). Time sweep experiments indicated that up to 1500  
126 s the foam preparation moduli are unchanged by stress and frequency. After 1500 s both elastic  
127 and viscosity moduli increase demonstrating that water is being lost from the foam (**Fig. 2B**).  
128 It has been suggested that stress increases the chances of water loss from the foam followed by  
129 coarsening, which leads to an increase in viscoelasticity[24]. The *E. pustulosus* whole foam is  
130 able to withstand shear stress and pressure before breaking down, demonstrating the long-  
131 lasting stability that may be observed in nature. Pharmaceutical foams are typically required to  
132 remain stable in order to be properly manipulated while being applied, but have low shear  
133 allowing them to break down shortly thereafter[25,26]. The foam derived from *E. pustulosus*

134 has exhibits long-term stability in harsh tropical environments (e.g. heat, high level exposure  
135 to ultraviolet light, and physical disruption) and behaves differently from typical  
136 pharmaceutical foams[2]. The *E. pustulosus* foam is stable enough to be manipulated and able  
137 to withstand shear forces, giving the potential to deliver drugs over prolonged periods.

138

Fig. 2

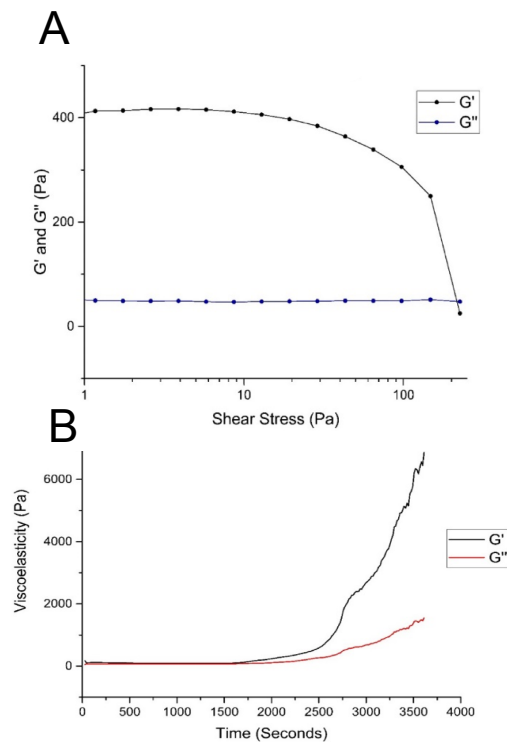

139

140

141 **Figure 2. Viscoelastic properties of *E. pustulosus* nest foam. 2A:** Time sweep rheology data  
142 for foam, showing both elastic ( $G'$ ) and viscous ( $G''$ ) moduli. Stress was set at 100 Pa, and  
143 carried out over 1 hour. **2B:** Oscillation sweep rheology data for *E. pustulosus* foam, showing  
144 both elastic ( $G'$ ) and viscous ( $G''$ ) moduli. Shear stress was increased from 1 Pa to 200 Pa.  
145 Each measurement was taken in triplicate at 20°C.

146

147

148

149

150 ***Frog foam biocompatibility with human epithelial cells***

151 To investigate the susceptibility of mammalian cells to any possible toxic effects of the foam,  
152 cells were cultured in the presence of foam fluid and potential toxicity was assayed using an  
153 MTT-based cell viability assay. Exposing HaCaT keratinocyte cells to a range of *E. pustulosus*  
154 foam concentrations did not affect the overall cell viability and multiplication of the cells (**Fig.**  
155 **3**). The higher foam fluid concentrations to which the cells were exposed are representative of  
156 foam concentration present in *E. pustulosus* nests (1-2mg/ml protein[17]). Cells exposed to the  
157 foam behave in the same manner as untreated control cells, demonstrating that the foam proteins  
158 from *E. pustulosus* are non-toxic to epithelial cells and are therefore unlikely to cause damage  
159 to the skin or underlying tissues if used as a topical drug delivery system. The foam and its  
160 protein components are already known to be harmless to human erythrocytes [27]. This high  
161 degree of biocompatibility is consistent with the foam and its precursor components being  
162 harmless to naked amphibian sperm, eggs, and oviduct surfaces of the frogs[27].

Fig. 3

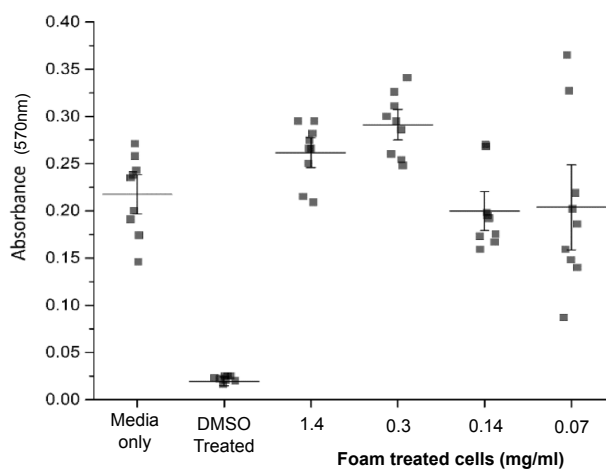

163

164 **Fig. 3. Biocompatibility of *E. pustulosus* nest foam with human epithelial cells.** MTT assay  
165 of HaCaT cell viability following exposure to a range of fluid foam concentrations over 24  
166 hours at 37°C. Each treatment was performed in triplicate, and media alone was used as normal  
167 viability control, and cells were treated with DMSO for non-viable control. Treatments 1 to 4  
168 were a dilution of fluid foam protein concentrations - 1.4 mg/ml, 0.3 mg/ml, 0.14 mg/ml and  
169 0.07 mg/ml respectively. Error bars represent the standard deviation of the data about the mean  
170 (horizontal line).

171



172 ***In vitro release of drug-loaded frog foam***

173 A single foam cell is defined as a bubble of gas enclosed in a liquid film that can be polyhedral  
174 or circular, heterogeneous or homogeneous, and usually range between 0.1 and 3mm in  
175 diameter[25]. The cell structure of *E. pustulosus* nest-foam was evaluated microscopically and  
176 the foam cell sizes measured (**Fig. 4A**). The foam cells in all samples were found to be a  
177 heterogeneous mixture of uneven, spherical and polyhedral cells with a Feret diameter ranging  
178 from 10-800  $\mu\text{m}$ , falling in the normal range of foam cell size of foams that have been used  
179 previously in pharmaceutical applications[25].

180 The relative density of the foam was found to be 0.25 g of protein/ml. AFM PeakForce analysis  
181 of the fluid foam and gel foam indicated consistency of the individual adhesion force ( $F_{\text{ad}}$ )  
182 measurements in each foam forms (**Fig. 4B**) indicating that the foam surface forces are  
183 homogeneous across the surface of each form. Moreover, in the case of the fluid foam, the  $F_{\text{ad}}$   
184 is higher and the AFM images shows the formation of  $\sim 200$  nm droplets as the foam was dried  
185 on to mica surfaces. This combination of low density and high structural stability is unusual  
186 and could suggest the utility of anuran foam-nest proteins as a pharmaceutical foam.

187

188

189

190

191

192

193

194

195

196

197

198

199

Fig. 4

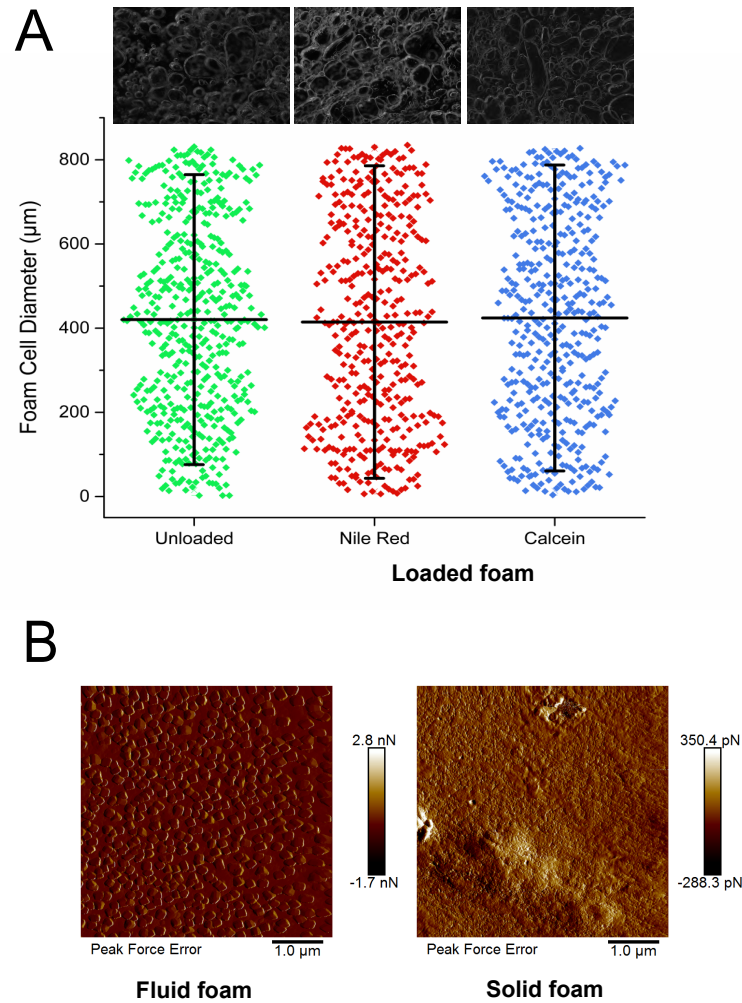

200

201

202 **Fig. 4. Drug loading of *E. pustulosus* nest foam does not alter the structure of the foam.**

203 **4A.** Foam cell diameter measurements scatter plot. Feret diameter of each foam cell/bubble was  
204 measured using Fiji software. Bars on the scatter encompass 10-90% of the data points, with  
205 the central horizontal line representing mean values. Above the scatter graph are representative  
206 images of unloaded foam, foam loaded with 1 mg/ml NR and foam loaded with 1mg/ml calcein.  
207 All images were taken using freshly defrosted foam. **4B.** Atomic Force Microscopy PeakForce  
208 analysis of foam fluid and gel foam to investigate the consistency of the adhesion force ( $F_{ad}$ ) in  
209 the foam.

210

211

212 To evaluate the drug release behaviour of *E. pustulosus* foam, experiments were performed  
213 using a dialysis-based method where two model compounds (one hydrophobic and one  
214 hydrophilic), NR and calcein, were encapsulated in the foams. Calcein exhibits a “burst-type”  
215 release profile from the foam, whereas NR is discharged at a linear rate over 168 hours (**Fig.**  
216 **5A & B**). These data indicate that the whole foam can absorb and release both hydrophobic  
217 (NR) and hydrophilic (calcein) molecules and release these at different rates over a prolonged  
218 period, with up to 85% of the loaded dye released over a period of 168 hours. Moreover, the  
219 loading of the nest foam with NR or calcein did not alter the cell size or shape of the foam (**Fig.**  
220 4).

221 To test the ability of the foam to release a clinically relevant drug molecule, the whole foam  
222 loaded in the same manner as for the previous two molecules with the red-pigmented antibiotic  
223 rifampicin. The dialysis method of release showed that rifampicin was released at a steady rate  
224 over the first five hours with a release of around 80% of loaded antibiotic, followed by a second,  
225 slower phase of release (**Fig. 5C**).

226 To further investigate the release of drug molecules from *E. pustulosus* foam, a novel trans-  
227 well-based release assay was developed, which emulates delivery of the foam preparation  
228 across a more complex protein coated surface. Foam was loaded in to a collagen-coated  
229 transwell sat in a 24-well tissue culture plate containing 1 ml of PBS and release of drug  
230 molecule was determined through the assay of the amount of rifampicin that passed from the  
231 foam through the transwell membrane. In the transwell assay, around 50% of rifampicin was  
232 also released over a 48 hrs (**Fig. 5D**). This novel transwell assay for investigating compound  
233 release from foams offers a simpler route to assaying drug release from foams and other  
234 aqueous-based materials that does not require the manipulation of dialysis tubing. Moreover,  
235 the release mimics clinical applications through release from a single face of the transwell (A  
236 schematic of the Transwell-based assay is provided in **Fig. 5E**) with the advantage that  
237 transwells are available in a number of sizes and pore diameters to suit a range of needs.

238 These data indicate that the foam can be loaded with drug molecules and can be used as an  
239 extended release system. The foam from *E. pustulosus* is stable and the API release is relatively  
240 slow with the foam potentially acting as a barrier in the local environment. The *E. pustulosus*  
241 foam compares well with release of rifampicin from loaded nanoparticles where 80-90% of  
242 release occurs, but within an 8 h time window[28].

Fig. 5

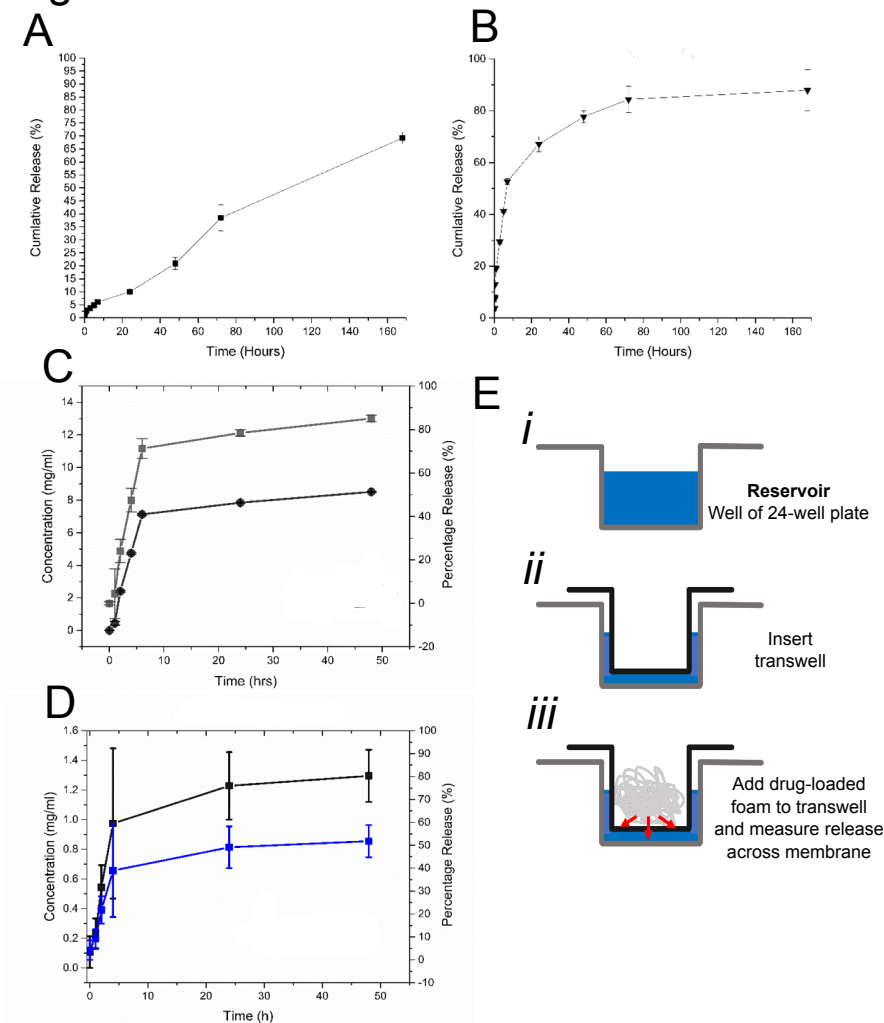

243

244 **Fig. 5. *E. pustulosus* nest foam can take up and release model compounds and drug molecules. 5A:**

245 Cumulative release of the dye NR from loaded whole foam over 168 hrs using the dialysis method.

246 **5B:** Cumulative release of the dye calcien from loaded whole foam over 168 hrs using the dialysis

247 method. **5C:** Cumulative release of the antibiotic rifampicin from loaded whole foam over 168 hrs

248 using the dialysis method; -●- concentration (mg/ml); -■- percentage release of the dye or drug. **5D:**

249 Release of rifampicin using novel transwell method; -■- concentration (mg/ml of protein); -■-

250 percentage release of rifampicin. Each point represents the mean of data collected in triplicate and

251 error bars indicate the standard deviation of the data. Sink conditions satisfied by replacing sample

252 volume with fresh buffer at each sample point. Dye release concentrations were calculated using

253 spectrophotometric standard curves for respective dye or drug. **5E:** Schematic representing the

254 experimental set-up using the novel transwell release assay, with reservoirs of 24-well plate filled

255 with buffer (*i*), the insertion of the permeable transwell (*ii*), and the addition of drug-loaded foam to

256 the transwell to allow drug release across the transwell membrane which can be quantified in the

257 reservoir.

258 Many nanoparticle-based systems release their drug-load rapidly resulting in ineffective long-  
259 term treatment possibilities[29] and have shown to exhibit some toxic properties[30]. The  
260 anuran foam-based preparations extend this release period to around 48 hrs depending on the  
261 nature of the compounds used, expanding the possible utility of these foam systems. While  
262 there has been multiple antibiotic loaded liposomes[31–33](AmBisome, Lambin, Doxil)  
263 brought to market, little have transferred the applicability to topical conditions, and their  
264 efficiency is still lacking. Further, tetracycline loaded nanocomposite hydrogels have been  
265 presented as for extended release delivery through the skin, released of maximum of 15% of  
266 the loaded antibiotic[32]. Foams are considered more popular with patients than gels[2], and a  
267 stable foam may provide a solution to both these issues. Previous studies of pharmaceutical  
268 foams have investigated the immediate delivery of drugs through to the dermis by exploiting  
269 the fast breakdown of foam preparations, but rarely have they been used for long-term drug  
270 release[2]. The foam derived from *E. pustulosus* provides a material with intermediate release  
271 properties, where uptake is efficient, its high stability and slow release properties enable  
272 continuous release over a clinically useful period of time.

## 273 **Conclusions**

274 There is an increased interest in drug delivery systems to refine the use of antimicrobial drugs  
275 currently available on the market, which may enable novel delivery systems help combat the  
276 rise of antimicrobial resistance in the clinic. Anuran foams from reproductive nests may provide  
277 a novel area for investigation in the area of controlled release. Anuran foam nests are highly  
278 biocompatible, durable and stable, and have excellent drug release properties. They exhibit  
279 none of the issues associated with fabric-based drug release such as instability, rapid release  
280 characteristics or toxicity. These advantages suggest that anuran foam may provide a novel  
281 topical drug delivery system for controlled release of drugs.

282

283

284

285

286

287

## 288 **Materials and Methods**

### 289 **Materials**

290 Nile red (NR), calcein, ethanol 97% (v/v), phosphate buffered saline (PBS) tablets (pH 7.2)  
291 were all purchased from Sigma and MTT (3-(4,5-dimethylthiazol-2-yl)-2,5-  
292 diphenyltetrazolium was purchased from Thermofisher.

293

### 294 **Collection of *Engystomops pustulosus* foam**

295 Freshly laid foam nests or adult frogs in amplexus (allowed to lay in captivity, before release)  
296 were collected from a number of sites in northern Trinidad in June and July of 2014, 2015 and  
297 2016. Nests were removed from the surface of the water in which they were produced and the  
298 eggs were removed manually before being stored at -20<sup>0</sup>C for transfer to the Glasgow, where  
299 they were stored at -80<sup>0</sup>C. Foam was freshly defrosted for all experiments. Soluble foam  
300 material ('foam fluid') was produced by centrifuging whole foam for 10 min (16,000 x g),  
301 providing a solution with approximately ~2 mg/ml protein. This also yields a  
302 supernatant/pellicle residual of semi-solid compressed foam ('gel foam') on top of the foam  
303 fluid layer.

### 304 **Microscopy**

305 *Optical microscopy*: Whole foam was defrosted at room temperature before use. All foam  
306 images were taken using transmitted light on a Nikon SMZ1500 stereomicroscope with images  
307 acquired using a DFK 33UX264 CMOS camera (The Imaging Source Europe GmbH,  
308 Germany) using NIS-Elements AR.3.2 software. Fiji software (<https://fiji.sc/>) from the ImageJ  
309 (<https://imagej.net>) package was used for image analysis.

310 *Atomic force microscopy (AFM)*: Samples (5  $\mu$ l) of foam were deposited onto a freshly cleaved  
311 mica surface (1.5 cm x 1.5 cm; G250-2 Mica sheets 25 mm x 25 mm x 0.15 mm; Agar Scientific  
312 Ltd, Essex, UK) and left to dry at room temperature for 1h before imaging. The images were  
313 obtained by scanning the mica surface in air under ambient conditions using a Scanning Probe  
314 Microscope (MultiMode<sup>®</sup> 8, Digital Instruments, Santa Barbara, CA, USA; Bruker Nanoscope  
315 analysis software Version 1.40), operating using the PeakForce QNM mode. The AFM  
316 measurements were obtained using ScanAsyst-air probes, for which the spring constant (0.58  
317 N/m; Nominal 0.4 N/m) and deflection sensitivity had been calibrated, but not the tip radius  
318 (the nominal value used was 2 nm).

### 319 **Sodium Dodecyl Sulfate Poly-Acrylamide Gel Electrophoresis (SDS-PAGE)**

320 Solid and liquid foam samples were electrophoresed on precast NuPAGE 15% polyacrylamide  
321 Bis-Tris gels (Invitrogen) at 120V using 4 X SDS reducing loading buffer (Invitrogen). Each  
322 gel was stained with InstaBlue Coomassie protein stain for ~45 min.

### 323 **Circular Dichroism Spectroscopy (CD)**

324 CD was used to investigate the overall secondary structure content of the proteins. Spectra were  
325 acquired using a Chirascan Plus (Applied Photophysics) instrument using a 0.1mm quartz  
326 cuvette (Hellma) at 20°C. All samples (10 mg/ml protein) were measured in the far-UV in a  
327 wavelength range of 180 nm to 280 nm range, with step size of 1 nm, bandwidth of 1 nm, and  
328 reading time of 1 s per nm. Triplicate measurements were taken for each sample run, baseline  
329 peak, PBS control and foam sample spectra, with triplicate spectra then averaged. Baseline and  
330 PBS traces were subtracted from the sample spectra before secondary structure predictions  
331 were made. All data analysis was performed using Global3 software and Excel.

### 332 **Fourier transform infrared spectroscopy**

333 Fourier transform infrared (FTIR) spectroscopy was carried out using a Nicolet iS10 Smart iTR  
334 spectrophotometer (Thermo Scientific). Solid and liquid foam spectra were recorded in the  
335 range on 4000 cm<sup>-1</sup> and 500 cm<sup>-1</sup>, over 128 scans at a resolution of 4 cm<sup>-1</sup> and an interval of 1  
336 cm<sup>-1</sup>. Background spectra were measured and the foam spectra were corrected accordingly.

### 337 **Rheology**

338 Rheology measurements were determined using a HAAKE MARS Rotational Rheometer  
339 (Thermo Scientific). Foam samples were subjected to oscillation sweeps and time sweeps. All  
340 experiments were carried out using P20 upper plate and TM20 lower plate. The oscillation  
341 sweeps were completed with a 1 mm gap and 0.1 Pa to 200 Pa range. Time sweep experiments  
342 were run for 1 h, at 100 Pa and 3 Hz using a 0.5 mm gap. Data points were collected in triplicate  
343 and averaged before analysis was carried out.

### 344 **MTT cell viability assay**

345 HaCaT cells (CLS, Eppelheim, Germany), a model human keratinocyte cell line were cultured  
346 in Dulbecco's modified Eagle's medium (DMEM) containing 4.5 g/l glucose supplemented  
347 with 10% (v/v) fetal bovine serum, 2 mM L-glutamine and 50 units/ml penicillin/streptomycin  
348 (cDMEM; Lonza, Slough, UK). Soluble foam proteins were prepared as above, with the  
349 supernatant being passed through a 0.22 µm filter (Millex 33 mm) and subsequently concentrated

350 using an Amicon 10 kDa spin filter. The protein concentration was determined by Bradford  
351 assay (BioRad). The HaCaT cells were plated onto 96 well plates ( $\sim 1 \times 10^3$  cells per well and  
352 grown to 80% confluence) and were treated with buffer containing foam proteins  
353 (concentrations indicated in the figures) prior to incubation at 37 °C for 24 hours. After 24 hours  
354 the media was removed from the cells, and replaced with 50  $\mu$ l of fresh media and 50  $\mu$ l of  
355 MTT (5mg/ml) and incubated for 1 h at 37 °C. This was followed by replacing the media with  
356 100  $\mu$ l DMSO and further incubation in the dark at room temperature for 30 minutes prior to  
357 reading the absorbance at 570nm[34]. Results were expressed as the % viability compared to  
358 non-treated cells  $\pm$  SEM.

### 359 ***In vitro* release of model compounds**

360 Aliquots (500 mg) of whole foam were loaded with dye by mixing with either 400  $\mu$ l of Nile  
361 Red (NR; hydrophobic; 1 mg/ml in ethanol) or calcein (hydrophilic; 1 mg/ml in ethanol). The  
362 mixture was placed in dialysis tubing and sealed before being submerged in 10 ml PBS at  
363 37 °C (pH 7; for NR-based release experiments, a 1:1 mixture of ethanol and PBS was used).  
364 The release experiments were carried out at 37 °C, over 168 hours. To satisfy the perfect-sink  
365 conditions, which allow for the determination of the diffusion parameters, the supernatant was  
366 replaced with fresh PBS at 37 °C at each time point (indicated in the graphs). The concentration  
367 of model compound in each sample was determined spectrophotometrically at 490 nm (calcein)  
368 or 590 nm (NR) and the concentration determined with reference to standard control calibration  
369 curves. Experiments were performed in triplicate.

### 370 ***In vitro* Antibiotic release**

371 Two *in vitro* techniques were used to investigate the release of the antibiotic rifampicin.

372 *Dialysis:* Aliquots (400 mg) of foam were mixed with 400  $\mu$ l of rifampicin (25 mg/ml). The  
373 loaded foam was placed into dialysis tubing, sealed and submerged in 10 ml of PBS. This was  
374 incubated at 37 °C for 48 hours. Samples (1 ml) were taken and fresh media added to maintain  
375 sink conditions. Samples were measured by spectrophotometrically at 475 nm[35] against a  
376 calibration curve.

377 *Transwell:* Aliquots of foam (100 mg) were loaded with 100  $\mu$ l of rifampicin (25mg/ml).  
378 Loaded foam was placed into a transwell collagen-coated permeable support (0.4  $\mu$ m;  
379 Nunc). Each support was inserted into 24 well plate well containing 600ul of PBS. The plate



380 was then incubated for 48 hours at 37 °C. PBS (600µl) was collected from a well for each time  
381 point, and the absorbance measured at 475nm, in triplicate.

382

383 **Supporting Information.**

384 **Supplementary Figure** <https://doi.org/10.6084/m9.figshare.13281416.v1>; **Fig. 1A.** Adult  
385 Túngara frog (*Engystomops pustulosus*). **B.** *In situ* *E. pustulosus* foam nest. **C.** SDS-PAGE gel  
386 of *E. pustulosus* whole foam from a wild-collected nest electrophoresed

387 **Acknowledgements**

388 The authors would like to acknowledge the Engineering and Physical Science Research Council  
389 (EPSRC) via the Doctoral Training Centre (DTC) at the University of Strathclyde for the PhD  
390 studentship support to SB. We would also like to thank Prof. Roger Downie, University of  
391 Glasgow for his long-term assistance in the field and advice on Tungara Frogs. We  
392 acknowledge the support of the Microbiology Society and the Pauline Fitzpatrick Memorial  
393 Travel Fund to SB to support fieldwork in Trinidad. EMO was supported by a PhD studentship  
394 from the Psoriasis Association (ST3 15).

395 We would also like to thank the Wildlife Section, Forestry Division, of the Government of  
396 Trinidad and Tobago for issuing Special Game Licences under the Conservation of Wildlife  
397 Act, permitting us to collect *E. pustulosus* nests (Special Game Licences 2014-2016 and  
398 Wildlife Special Export Licence numbers: 001741, 001161 and 000646).

399

400 **Conflict of interest**

401 All authors declare that they have no conflict of interest in relation to this work.

402 **References**

403

404 1. Haznar-Garbacz D, Garbacz G, Weitschies W. 2019 Development of oral foams for topical  
405 treatment of inflammatory bowel disease. *J Drug Deliv Sci Tec* **50**, 287–292.

406 (doi:10.1016/j.jddst.2019.01.022)

407 2. Zhao Y, Jones SA, Brown MB. 2010 Dynamic foams in topical drug delivery. *J Pharm*

408 *Pharmacol* **62**, 678–84. (doi:10.1211/jpp.62.06.0003)

409 3. Gennari CGM, Selmin F, Minghetti P, Cilurzo F. 2019 Medicated foams and film forming

410 dosage forms as tools to improve the thermodynamic activity of drugs to be administered

411 through the skin. *Curr Drug Deliv* **16**, 461–471. (doi:10.2174/1567201816666190118124439)

412 4. Zhao Y, Brown MB, Jones SA. 2010 Pharmaceutical foams: are they the answer to the

413 dilemma of topical nanoparticles? *Nanomed Nanotechnol Biology Medicine* **6**, 227–236.

414 (doi:10.1016/j.nano.2009.08.002)

415 5. Svagan AJ, Benjamins J-W, Al-Ansari Z, Shalom DB, Müllertz A, Wågberg L, Löbmann

416 K. 2016 Solid cellulose nanofiber based foams - Towards facile design of sustained drug

417 delivery systems. *J Control Release Official J Control Release Soc* **244**, 74–82.

418 (doi:10.1016/j.jconrel.2016.11.009)

419 6. Russo M, Amara Z, Fenneteau J, Chaumont-Olive P, Maimouni I, Tabeling P, Cossy J.

420 2020 Stable liquid foams from a new polyfluorinated surfactant. *Chem Commun*

421 (doi:10.1039/d0cc02182b)

422 7. Fameau A-L *et al.* 2011 Smart Foams: Switching Reversibly between Ultrastable and

423 Unstable Foams. *Angewandte Chemie Int Ed* **50**, 8264–8269. (doi:10.1002/anie.201102115)

424 8. Arriaga LR, Drenckhan W, Salonen A, Rodrigues JA, Íñiguez-Palomares R, Rio E,

425 Langevin D. 2012 On the long-term stability of foams stabilised by mixtures of nano-particles

426 and oppositely charged short chain surfactants. *Soft Matter* **8**, 11085.

427 (doi:10.1039/c2sm26461g)

428 9. Stocco A, Carriere D, Cottat M, Langevin D. 2010 Interfacial Behavior of Catanionic

429 Surfactants. *Langmuir* **26**, 10663–10669. (doi:10.1021/la100954v)

430 10. Heunis TDJ, Dicks LMT. 2010 Nanofibers offer alternative ways to the treatment of skin

431 infections. *J Biomed Biotechnology* **2010**, 510682. (doi:10.1155/2010/510682)

432 11. Crump ML. 2015 Anuran Reproductive Modes: Evolving Perspectives. *J Herpetol* **49**, 1–

433 16. (doi:10.1670/14-097)

434 12. Pereira EB, Pinto-Ledezma JN, Freitas CG de, Villalobos F, Collevatti RG, Maciel NM.

435 2017 Evolution of the anuran foam nest: trait conservatism and lineage diversification. *Biol J*

436 *Linn Soc* **122**, 814–823. (doi:10.1093/biolinnean/blx110)

- 437 13. Cooper A, Kennedy MW. 2010 Biofoams and natural protein surfactants. *Biophys Chem*  
438 **151**, 96–104. (doi:10.1016/j.bpc.2010.06.006)
- 439 14. Cooper A, Vance SJ, Smith BO, Kennedy MW. 2017 Frog foams and natural protein  
440 surfactants. *Colloids Surfaces Physicochem Eng Aspects* **534**, 120–129.  
441 (doi:10.1016/j.colsurfa.2017.01.049)
- 442 15. Downie, R J. 1988 Functions of the foam in the foam-nesting leptodactylid *Physalaemus*  
443 *pustulosus*. *The Herpetological Journal* **1**, 302–307.
- 444 16. Downie, R. J. 1990 Functions of the foam in foam-nesting leptodactylids anti-predator  
445 effects of *Physalaemus pustulosus* foam. **1**, 501–503.
- 446 17. Fleming RI, Mackenzie CD, Cooper A, Kennedy MW. 2009 Foam nest components of the  
447 túngara frog: a cocktail of proteins conferring physical and biological resilience. *Proceedings*  
448 *of the Royal Society B: Biological Sciences* **276**. (doi:10.1098/rspb.2008.1939)
- 449 18. Cooper A, Kennedy MW, Fleming RI, Wilson EH, Videler H, Wokosin DL, Su T, Green  
450 RJ, Lu JR. 2005 Adsorption of Frog Foam Nest Proteins at the Air-Water Interface. *Biophys J*  
451 **88**, 2114–2125. (doi:10.1529/biophysj.104.046268)
- 452 19. Mackenzie CD, Smith BO, Meister A, Blume A, Zhao X, Lu JR, Kennedy MW, Cooper  
453 A. 2009 Ranaspumin-2: Structure and Function of a Surfactant Protein from the Foam Nests  
454 of a Tropical Frog. *Biophysical Journal* **96**. (doi:10.1016/j.bpj.2009.03.044)
- 455 20. Choi H-J, Ebersbacher CF, Myung NV, Montemagno CD. 2012 Synthesis of  
456 nanoparticles with frog foam nest proteins. *J Nanopart Res* **14**, 1092. (doi:10.1007/s11051-  
457 012-1092-1)
- 458 21. Suvarnapathaki S, Wu X, Lantigua D, Nguyen MA, Camci-Unal G. 2019 Breathing life  
459 into engineered tissues using oxygen-releasing biomaterials. *Npg Asia Mater* **11**, 65.  
460 (doi:10.1038/s41427-019-0166-2)
- 461 22. Freire MCLC, Jr. FA, Marcelino HR, Picciani PH de S, Silva KG de H e, Genre J,  
462 Oliveira AG de, Egito EST do. 2017 Understanding Drug Release Data through  
463 Thermodynamic Analysis. *Materials* **10**, 651. (doi:10.3390/ma10060651)
- 464 23. KONG J, YU S. 2007 Fourier Transform Infrared Spectroscopic Analysis of Protein  
465 Secondary Structures. *Acta Bioch Bioph Sin* **39**, 549–559. (doi:10.1111/j.1745-  
466 7270.2007.00320.x)
- 467 24. Marze SPL, Saint-Jalmes A, Langevin D. 2005 Protein and surfactant foams: linear  
468 rheology and dilatancy effect. *Colloids Surfaces Physicochem Eng Aspects* **263**, 121–128.  
469 (doi:10.1016/j.colsurfa.2005.01.014)
- 470 25. Arzhavitina A, Steckel H. 2010 Foams for pharmaceutical and cosmetic application. *Int J*  
471 *Pharmaceut* **394**, 1–17. (doi:10.1016/j.ijpharm.2010.04.028)

- 472 26. Kealy T, Abram A, Hunt B, Buchta R. 2007 The rheological properties of pharmaceutical  
473 foam: implications for use. *Int J Pharmaceut* **355**, 67–80.  
474 (doi:10.1016/j.ijpharm.2007.11.057)
- 475 27. Clark BT. 2007 The natural history of Amphibian skin secretions, their normal  
476 functioning and potential medical applications. *Biol Rev* **72**, 365–379. (doi:10.1111/j.1469-  
477 185x.1997.tb00018.x)
- 478 28. Sung JC, Padilla DJ, Garcia-Contreras L, Verberkmoes JL, Durbin D, Peloquin CA,  
479 Elbert KJ, Hickey AJ, Edwards DA. 2009 Formulation and pharmacokinetics of self-  
480 assembled rifampicin nanoparticle systems for pulmonary delivery. *Pharmaceut Res* **26**,  
481 1847–55. (doi:10.1007/s11095-009-9894-2)
- 482 29. Sabaeifard P, Abdi-Ali A, Soudi MR, Gamazo C, Irache JM. 2016 Amikacin loaded  
483 PLGA nanoparticles against *Pseudomonas aeruginosa*. *European J Pharm Sci Official J*  
484 *European Fed Pharm Sci* **93**, 392–8. (doi:10.1016/j.ejps.2016.08.049)
- 485 30. Toppo FA, Pawar RS. 2015 Novel drug delivery strategies and approaches for wound  
486 healing. **2**, 12-20.
- 487 31. Azanza JR, Sádada B, Reis J. 2015 Liposomal formulations of amphotericin B:  
488 differences according to the scientific evidence. *Revista Española De Quimioterapia*  
489 *Publicación Oficial De La Sociedad Española De Quimioterapia* **28**, 275–81.
- 490 32. Namazi H, Rakhshaei R, Hamishehkar H, Kafil HS. 2016 Antibiotic loaded  
491 carboxymethylcellulose/MCM-41 nanocomposite hydrogel films as potential wound dressing.  
492 *Int J Biol Macromol* **85**, 327–334. (doi:10.1016/j.ijbiomac.2015.12.076)
- 493 33. Lee M-K. 2019 Clinical usefulness of liposomal formulations in cancer therapy: lessons  
494 from the experiences of doxorubicin. *J Pharm Investigation* **49**, 203–214.  
495 (doi:10.1007/s40005-018-0398-0)
- 496 34. Niles AL, Moravec RA, Worzella TJ, Evans NJ, Riss TL. 2013 High-Throughput  
497 Screening Methods in Toxicity Testing. , 107–127. (doi:10.1002/9781118538203.ch5)
- 498 35. Benetton SA, Kedor-Hackmann ERM, Santoro MIRM, Borges VM. 1998 Visible  
499 spectrophotometric and first-derivative UV spectrophotometric determination of rifampicin  
500 and isoniazid in pharmaceutical preparations. *Talanta* **47**, 639–643. (doi:10.1016/s0039-  
501 9140(98)00111-8)

502

503

504 **Figure legends**

505 **Fig. 1. Structural characterisation of *E. pustulosus* nest foam proteins. 1A:** Circular  
506 Dichroism of foam fluid using 0.1mm pathlength cuvettes containing 1mg/ml protein foam  
507 fluid solution. **1B:** Fourier Transform Infrared Spectroscopy (FTIR) foam fluid (**B**) and whole  
508 foam (**C**). For both CD and FTIR spectra were corrected for baseline and buffer effects each  
509 measurement was carried out in triplicate and the mean of the data is presented.

510 **Fig. 2. Viscoelastic properties of *E. pustulosus* nest foam. 2A:** Time sweep rheology data for  
511 foam, showing both elastic ( $G'$ ) and viscous ( $G''$ ) moduli. Stress was set at 100 Pa, and carried  
512 out over 1 hour. **2B:** Oscillation sweep rheology data for *E. pustulosus* foam, showing both  
513 elastic ( $G'$ ) and viscous ( $G''$ ) moduli. Shear stress was increased from 1 Pa to 200 Pa. Each  
514 measurement was taken in triplicate at 20°C.

515 **Fig. 3. Biocompatibility of *E. pustulosus* nest foam with human epithelial cells.** MTT assay  
516 of HaCaT cell viability following exposure to a range of fluid foam concentrations over 24  
517 hours at 37°C. Each treatment was performed in triplicate, and media alone was used as normal  
518 viability control, and cells were treated with DMSO for non-viable control. Treatments 1 to 4  
519 were a dilution of fluid foam protein concentrations - 1.4 mg/ml, 0.3 mg/ml, 0.14 mg/ml and  
520 0.07 mg/ml respectively. Error bars represent the standard deviation of the data about the mean  
521 (horizontal line).

522 **Fig. 4. Drug loading of *E. pustulosus* nest foam does not alter the structure of the foam.**  
523 **4A.** Foam cell diameter measurements scatter plot. Feret diameter of each foam cell/bubble was  
524 measured using Fiji software. Bars on the scatter encompass 10-90% of the data points, with  
525 the central horizontal line representing mean values. Above the scatter graph are representative  
526 images of unloaded foam, foam loaded with 1 mg/ml NR and foam loaded with 1mg/ml calcein.  
527 All images were taken using freshly defrosted foam. **4B.** Atomic Force Microscopy PeakForce  
528 analysis of foam fluid and gel foam to investigate the consistency of the adhesion force ( $F_{ad}$ ) in  
529 the foam.

530

531 **Fig. 5. *E. pustulosus* nest foam can take up and release model compounds and drug**  
532 **molecules. 5A:** Cumulative release of the dye NR from loaded whole foam over 168 hrs using  
533 the dialysis method. **5B:** Cumulative release of the dye calcein from loaded whole foam over  
534 168 hrs using the dialysis method. **5C:** Cumulative release of the antibiotic rifampicin from  
535 loaded whole foam over 168 hrs using the dialysis method; -●- concentration (mg/ml); -■-

536 percentage release of the dye or drug. **5D:** Release of rifampicin using novel transwell method;  
537 -■- concentration (mg/ml of protein); -■- percentage release of rifampicin. Each point  
538 represents the mean of data collected in triplicate and error bars indicate the standard deviation  
539 of the data. Sink conditions satisfied by replacing sample volume with fresh buffer at each  
540 sample point. Dye release concentrations were calculated using spectrophotometric standard  
541 curves for respective dye or drug. **5E:** Schematic representing the experimental set-up using  
542 the novel transwell release assay, with reservoirs of 24-well plate filled with buffer (**i**), the  
543 insertion of the permeable transwell (**ii**), and the addition of drug-loaded foam to the transwell  
544 to allow drug release across the transwell membrane which can be quantified in the reservoir.

545 **Supplementary Figure** <https://doi.org/10.6084/m9.figshare.13281416.v1>

546 **Supplementary Fig. 1A.** Adult Túngara frog (*Engystomops pustulosus*). **B.** *In situ* *E.*  
547 *pustulosus* foam nest. **C.** SDS-PAGE gel of *E. pustulosus* whole foam from a wild-collected  
548 nest electrophoresed through a 4-20% Tris-Glycine NuPAGE gel under reducing conditions.  
549 Proteins in the 10-30 kDa range are the ranaspumins (RSN described by Fleming et al., 2009 -  
550 highlighted by red boxes. RSN molecular mass based on amino acid sequence: RSN-1, 14kDa;  
551 RSN-2, 11kDa; RSN-3, 18kDa; RSN-4, 21kDa; RSN-5, 18kDa; RSN-6, 27kDa) **Marker:** 10-  
552 200kDa Broad Range marker (New England Biolabs; #P7704).

553

#### 554 **Reference**

555 Fleming, R. I., C.D. Mackenzie, A. Cooper, M.W. Kennedy, Foam nest components of the  
556 Túngara frog: a cocktail of proteins conferring physical and biological resilience, Proceedings  
557 of the Royal Society B: Biological Sciences. 276 (2009). doi:10.1098/rspb.2008.1939.

558

559
